# Supplementary material
Source: publisher site journal article supplement (https://cdn.jamanetwork.com/ama/content_public/journal/intemed/936342/ioi170022supp2_prod.pdf)
Supplement: Supplementary file 1 [file ioi170022supp2_prod.pdf]

## Supplementary Online Content

Trepanowski JF, Kroeger CM, Barnosky A, et al. Effect of alternate-day fasting on weight loss, weight maintenance, and cardioprotection among metabolically healthy obese adults: a randomized clinical trial. *JAMA Intern Med*. Published online May 1, 2017.

doi:10.1001/jamainternmed.2017.0936

**eFigure 1.** Experimental Design

**eFigure 2.** Mean Energy Restriction by Diet Group at Month 6 Measured by Doubly Labeled Water

**eTable 1.** Dietary Intake by Diet Group and Time Point

**eTable 2.** Physical activity by Diet Group and Time Point

This supplementary material has been provided by the authors to give readers additional information about their work.

**eFigure 1.** Experimental Design

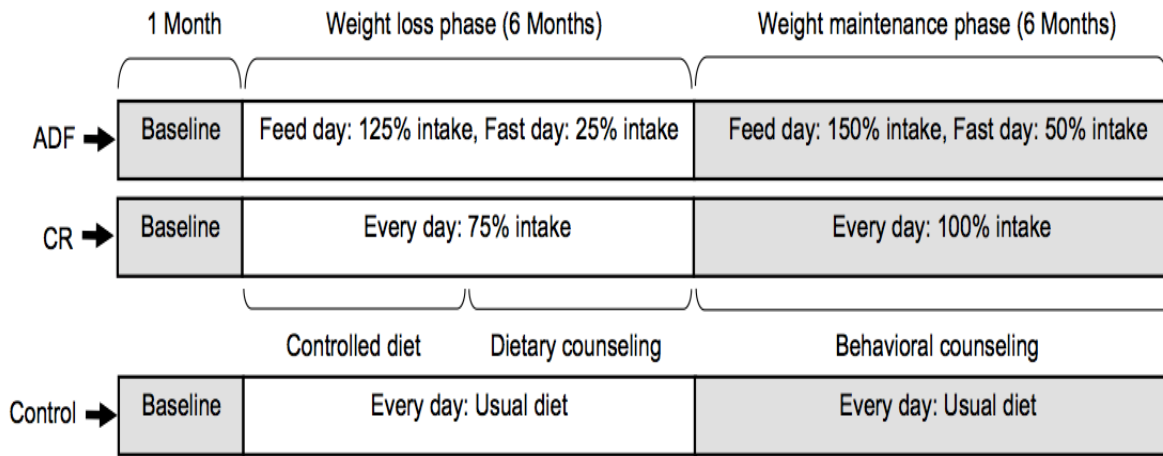

**eFigure 2.** Mean Energy Restriction by Diet Group at Month 6 Measured by Doubly Labeled Water

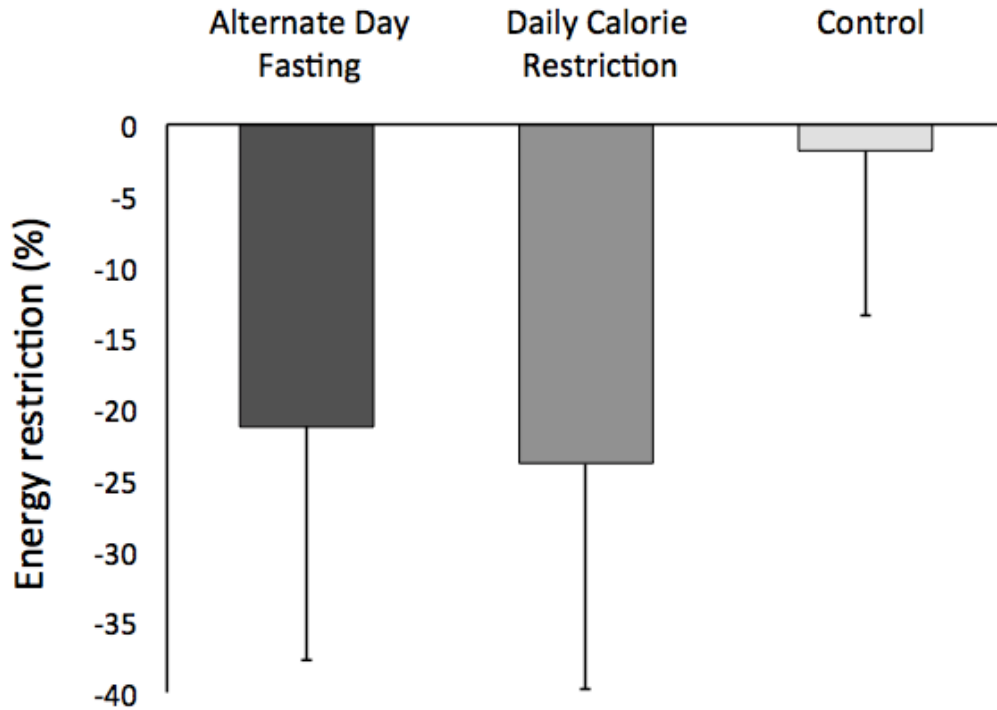

Data are expressed as mean (SD). Percent energy restriction was significantly greater in the alternate day fasting group and daily calorie restriction group when compared to the Control group ( $P = 0.001$ ). There was no statistically significant difference between the alternate day fasting group and daily calorie restriction group for percent energy restriction ( $P = 0.65$ ) by month 6. The doubly labeled water analysis for energy restriction was only performed in a subset of subjects due to issues with improper water administration in certain individuals during the trial. Data were available from 16 participants in the alternate day fasting group, 21 participants in the daily calorie restriction group, and 11 participants in the control group.

**eTable 1.** Dietary Intake by Diet Group and Time Point

| Variable               | Alternate Day Fasting Group |           |           |           |          | Daily Calorie Restriction Group |                        |                         | Control Group           |                        |                         |
|------------------------|-----------------------------|-----------|-----------|-----------|----------|---------------------------------|------------------------|-------------------------|-------------------------|------------------------|-------------------------|
|                        | Baseline Value (n = 25)     | Feast day |           | Fast day  |          | Baseline Value (n = 30)         | 6-Month Value (n = 17) | 12-Month Value (n = 20) | Baseline Value (n = 23) | 6-Month Value (n = 13) | 12-Month Value (n = 19) |
| Protein (% kcal)       | 18 ± 11                     | 19 ± 7    | 18 ± 5    | 19 ± 10   | 19 ± 6   | 16 ± 3                          | 17 ± 4                 | 19 ± 7                  | 17 ± 3                  | 18 ± 6                 | 18 ± 4                  |
| Carbohydrates (% kcal) | 47 ± 8                      | 46 ± 8    | 46 ± 7    | 47 ± 10   | 47 ± 20  | 48 ± 8                          | 50 ± 5                 | 47 ± 16                 | 47 ± 8                  | 47 ± 9                 | 45 ± 6                  |
| Fat (% kcal)           | 35 ± 4                      | 35 ± 5    | 36 ± 11   | 36 ± 43   | 36 ± 33  | 36 ± 6                          | 33 ± 5                 | 34 ± 11                 | 36 ± 7                  | 37 ± 7                 | 37 ± 8                  |
| Cholesterol (mg)       | 220 ± 102                   | 211 ± 106 | 241 ± 155 | 161 ± 109 | 151 ± 88 | 270 ± 131                       | 230 ± 146              | 244 ± 91                | 280 ± 101               | 240 ± 83               | 258 ± 115               |
| Fiber (g)              | 14 ± 5                      | 14 ± 5    | 16 ± 6    | 11 ± 6    | 14 ± 6   | 16 ± 6                          | 19 ± 8                 | 19 ± 6                  | 15 ± 6                  | 12 ± 4                 | 19 ± 12                 |

Data are expressed as mean (SD); only observed values included. No differences in nutrient intake between the alternate day fasting group, daily calorie restriction group, or control group at baseline, month 6, or month 12. No differences in nutrient intake over time within each group.

**eTable 2.** Physical Activity by Diet Group and Time Point

| Step/day | Alternate Day Fasting Group | Daily Calorie Restriction Group | Control Group        |
|----------|-----------------------------|---------------------------------|----------------------|
| Baseline | 7835 ± 3437 (n = 34)        | 7648 ± 2596 (n = 35)            | 7165 ± 3233 (n = 28) |
| Month 6  | 8143 ± 2051 (n = 25)        | 8832 ± 4495 (n = 24)            | 6948 ± 2723 (n = 22) |
| Month 12 | 8323 ± 3107 (n = 20)        | 8152 ± 4086 (n = 22)            | 7150 ± 2918 (n = 20) |

Data are expressed as mean (SD); only observed values included. No differences in physical activity (steps/day) between the alternate day fasting group, daily calorie restriction group, or control group at baseline, month 6, or month 12. No differences in physical activity over time within each group.
